# Supplementary material for: Hospitalization, case fatality, comorbidities, and isolated pathogens of adult inpatients with pneumonia from 2013 to 2022: a real-world study in Guangzhou, China
Source: PubMed Central journal article supplement (PMC10759351; doi:10.1186/s12879-023-08929-y), 2024-01-02
Supplement: 12879_2023_8929_MOESM2_ESM.pdf [file 12879_2023_8929_MOESM2_ESM.pdf]

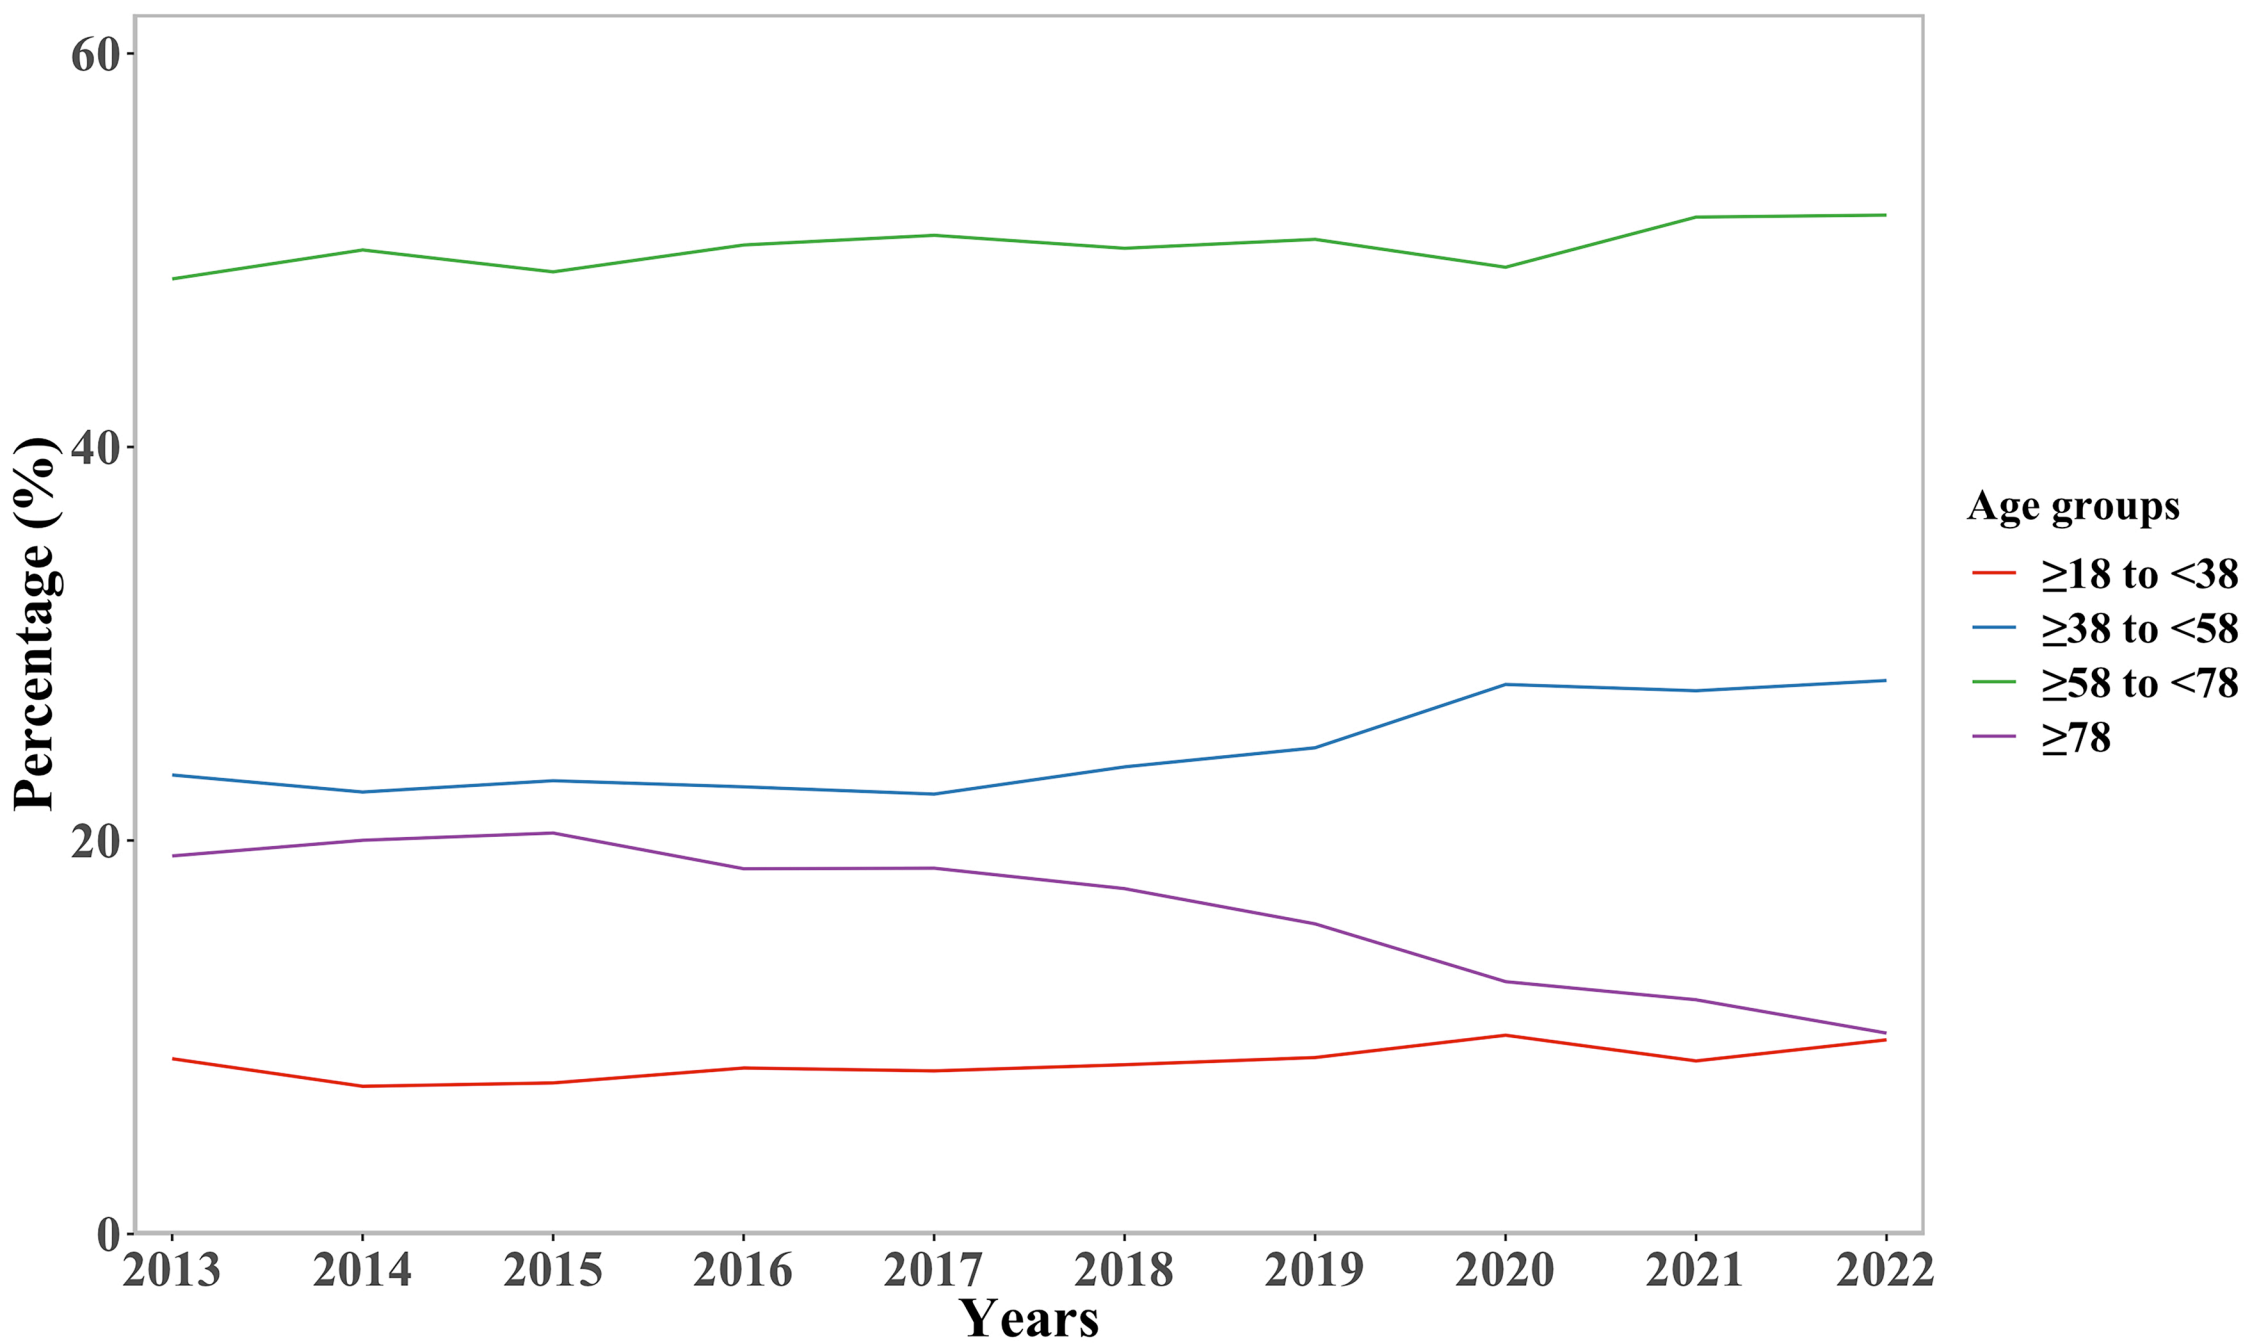

**Supplementary Figure 2** The trends in age composition in hospitalized patients with pneumonia from 2013 to 2022.
